# Supplementary material for: Genetic alterations in the 3q26.31-32 locus confer an aggressive prostate cancer phenotype
Source: PubMed Central journal article supplement (PMC7429505; doi:10.1038/s42003-020-01175-x), 2020-08-14
Supplement: 42003_2020_1175_MOESM2_ESM.pdf [file 42003_2020_1175_MOESM2_ESM.pdf]

## **Description of Additional Supplementary Files**

### **Supplementary Data 1: alteration\_frequency\_in\_PCa\_cohorts**

Somatic alterations in NAALADL2 and TBL1XR1 and their frequencies across prostate cancer cohorts from cbiportal (full list of included cohorts in appendix 1).

### **Supplementary Data 2: Gain\_Co-occurrence\_in\_3\_cohorts**

The genome wide co-occurrence (calculated using a Fisher's exact test) of copy-number gains with gains in NAALADL2 in three cohorts. All significant gains defined using GISTIC 2.

### **Supplementary Data 3: Co-amplified\_oncogenes**

Significantly co-amplified genes in all three cohorts which are identified as oncogenes by The Network of Cancer Genes (NCG) database.

### **Supplementary Data 4: Clinical\_data**

Clinical data from the TCGA used to compare clinical associations with gains in NAALADL2 and TBL1XR1.

### **Supplementary Data 5: Multivariable\_Cox\_regressions\_TCGA**

Outputs from multivariable cox regression models to predict disease-free survival in the TCGA cohort.

### **Supplementary Data 6: DEG\_analysis\_DESeq2**

The output of DESeq2 comparing differentially expressed genes between patients with and without gains in NAALADL2 and TBL1XR1.

### **Supplementary Data 7: Oncogenes\_present\_in\_DEG\_list\_overlap**

Differentially expressed genes which overlap between NAALADL2 and TBL1XR1 which are identified as oncogenes by The Network of Cancer Genes (NCG) database.

### **Supplementary Data 8: Heatmap\_z\_scores**

Scaled and centred (z scores) expression of genes altered in patients with gains in NAALADL2 and TBL1XR1 used to create the heatmap shown in figure 3.

### **Supplementary Data 9: GSEA\_for\_NAALADL2\_TBL1XR1\_DEGs**

Gene set enrichment analysis for DEGs between those with and without gains in NAALADL2 or TBL1XR1.

### **Supplementary Data 10: ORA\_Analysis\_for\_shared\_DEGs**

Overrepresentation analysis performed on the overlapping DEGs for NAALADL2 gains and TBL1XR1 gains.
